# Supplementary material for: Near-infrared photocatalytic activity induced by intrinsic defects in Bi2MO6(M = W, Mo)
Source: Royal Society of Chemistry journal article supplement (doi:10.1039/c4cp01846j), 2014-07-17
Supplement: c4cp01846j1.pdf [file c4cp01846j1.pdf]

## SUPPORTING INFORMATION

### Near-Infrared Photocatalytic Activity Induced by Intrinsic Defects in $\text{Bi}_2\text{MO}_6$

( $\text{M}=\text{W}, \text{Mo}$ )

Tao Jing,<sup>a,b</sup> Ying Dai,<sup>\*a</sup> Wei Wei,<sup>a</sup> Xiangchao Ma,<sup>a</sup> and Baibiao Huang<sup>a</sup>

<sup>a</sup>School of Physics, State Key Laboratory of Crystal Materials, Shandong University, Jinan 250100, People's Republic of China

<sup>b</sup>College of Physics and Electronic Engineering, Kaili University, Kaili Guizhou 556011, People's Republic of China

\*E-mail: daiy60@sina.com

**Figure S1** Energy band of (a)  $\text{Bi}_{\text{vac}}\text{-Bi}_2\text{WO}_6$ , (b)  $\text{W}_{\text{vac}}\text{-Bi}_2\text{WO}_6$ , (c)  $\text{Bi}_{\text{W}}\text{-Bi}_2\text{WO}_6$ , (d)  $\text{W}_{\text{Bi}}\text{-Bi}_2\text{WO}_6$ , (e)  $\text{W}_{\text{int}}\text{-Bi}_2\text{WO}_6$ , (f)  $\text{O}_{\text{int}}\text{-Bi}_2\text{WO}_6$ . The red dashed lines represent the Fermi level, which is set to zero.

**Figure S2** Projected density of states (PDOS) of (a)  $\text{Bi}_{\text{vac}}\text{-Bi}_2\text{WO}_6$ , (b)  $\text{W}_{\text{vac}}\text{-Bi}_2\text{WO}_6$ , (c)  $\text{Bi}_{\text{W}}\text{-Bi}_2\text{WO}_6$ , (d)  $\text{W}_{\text{Bi}}\text{-Bi}_2\text{WO}_6$ , (e)  $\text{W}_{\text{int}}\text{-Bi}_2\text{WO}_6$ , (f)  $\text{O}_{\text{int}}\text{-Bi}_2\text{WO}_6$ .

**Figure S3** Energy band of (a)  $\text{Bi}_{\text{vac}}\text{-Bi}_2\text{MoO}_6$ , (b)  $\text{Mo}_{\text{vac}}\text{-Bi}_2\text{MoO}_6$ , (c)  $\text{Bi}_{\text{Mo}}\text{-Bi}_2\text{MoO}_6$ , (d)  $\text{Mo}_{\text{Bi}}\text{-Bi}_2\text{MoO}_6$ , (e)  $\text{Mo}_{\text{int}}\text{-Bi}_2\text{MoO}_6$ , (f)  $\text{O}_{\text{int}}\text{-Bi}_2\text{MoO}_6$ . The red dashed lines represent the Fermi level, which is set to zero.

**Figure S4** Projected density of states (PDOS) of (a)  $\text{Bi}_{\text{vac}}\text{-Bi}_2\text{MoO}_6$ , (b)  $\text{Mo}_{\text{vac}}\text{-Bi}_2\text{MoO}_6$ , (c)  $\text{Bi}_{\text{Mo}}\text{-Bi}_2\text{MoO}_6$ , (d)  $\text{Mo}_{\text{Bi}}\text{-Bi}_2\text{MoO}_6$ , (e)  $\text{Mo}_{\text{int}}\text{-Bi}_2\text{MoO}_6$ , (f)  $\text{O}_{\text{int}}\text{-Bi}_2\text{MoO}_6$ .

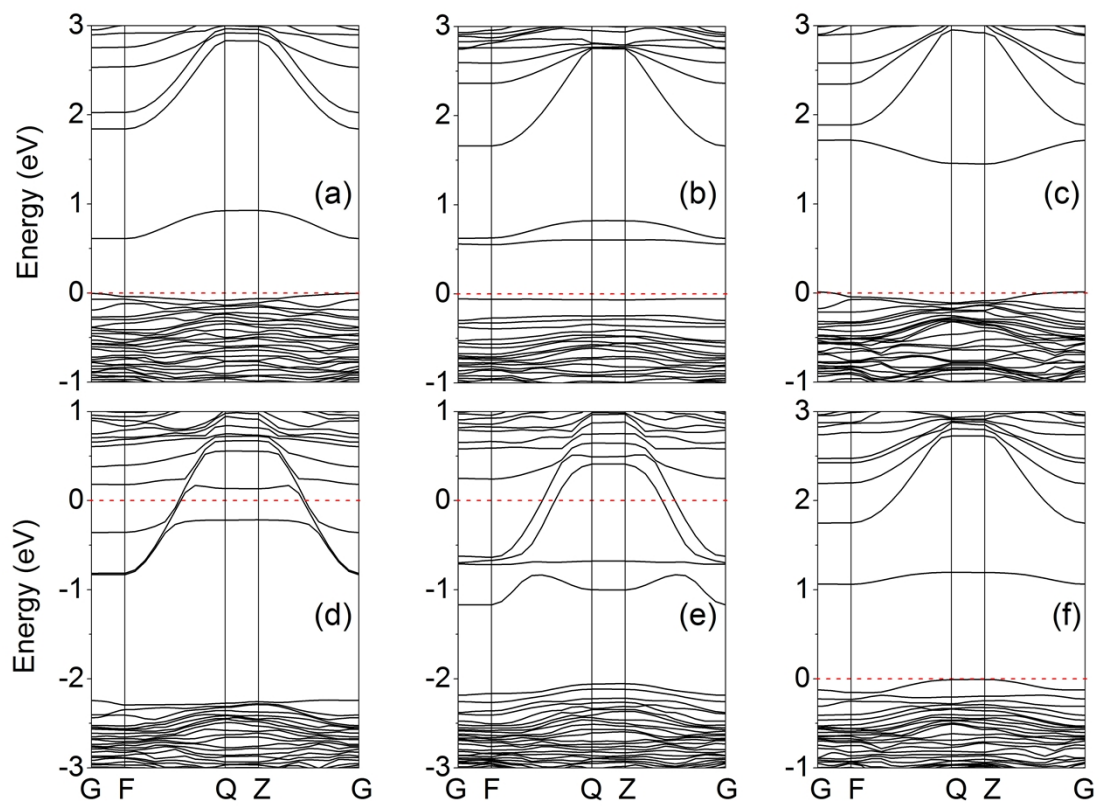

**Figure S1**

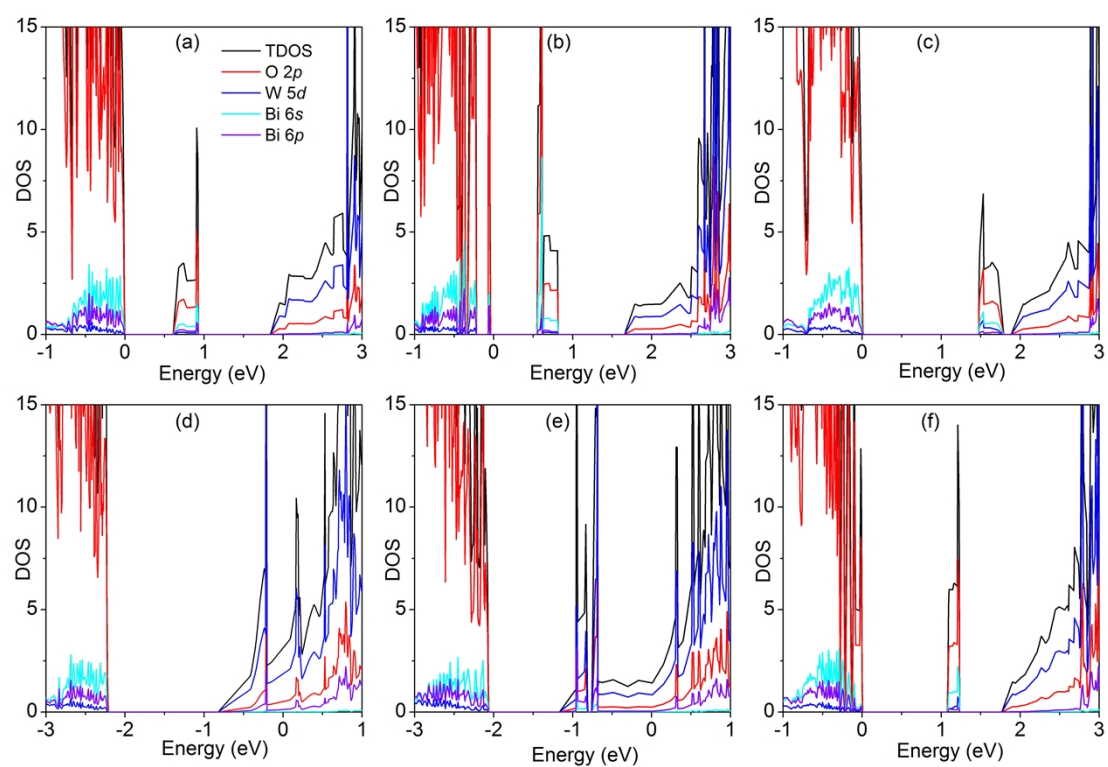

Figure S2

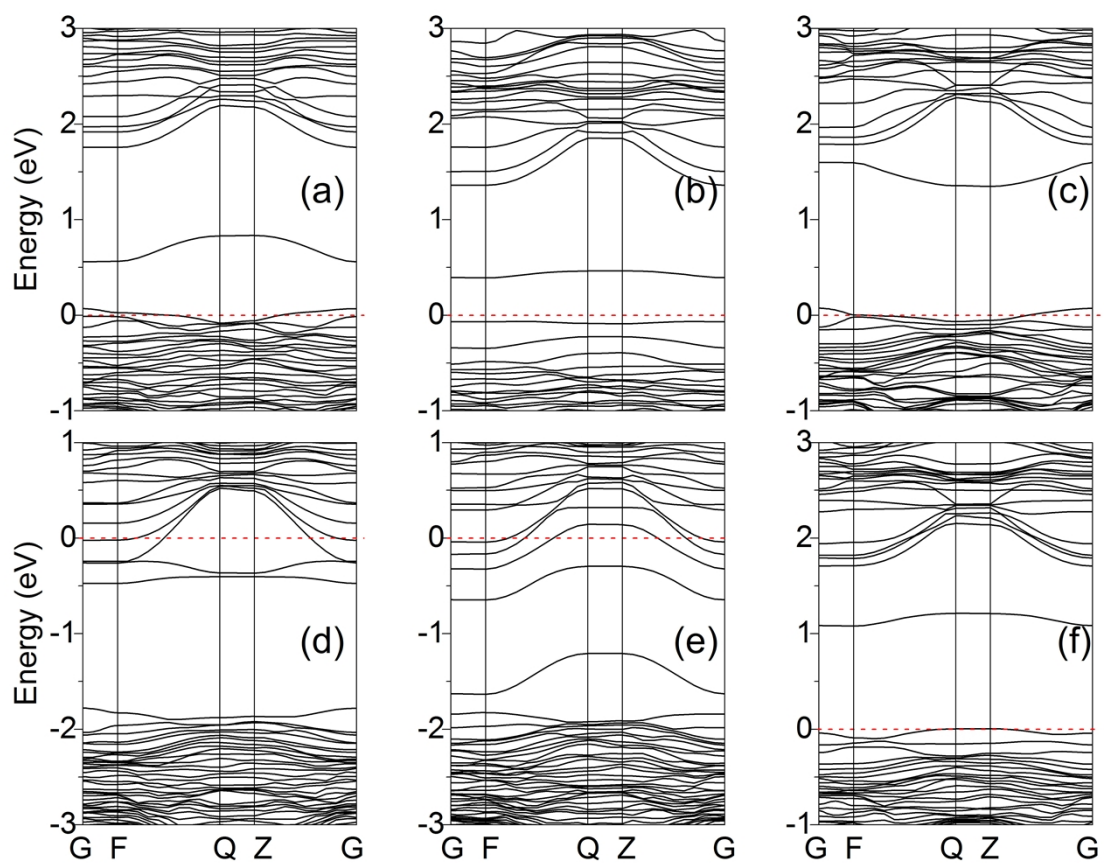

Figure S3

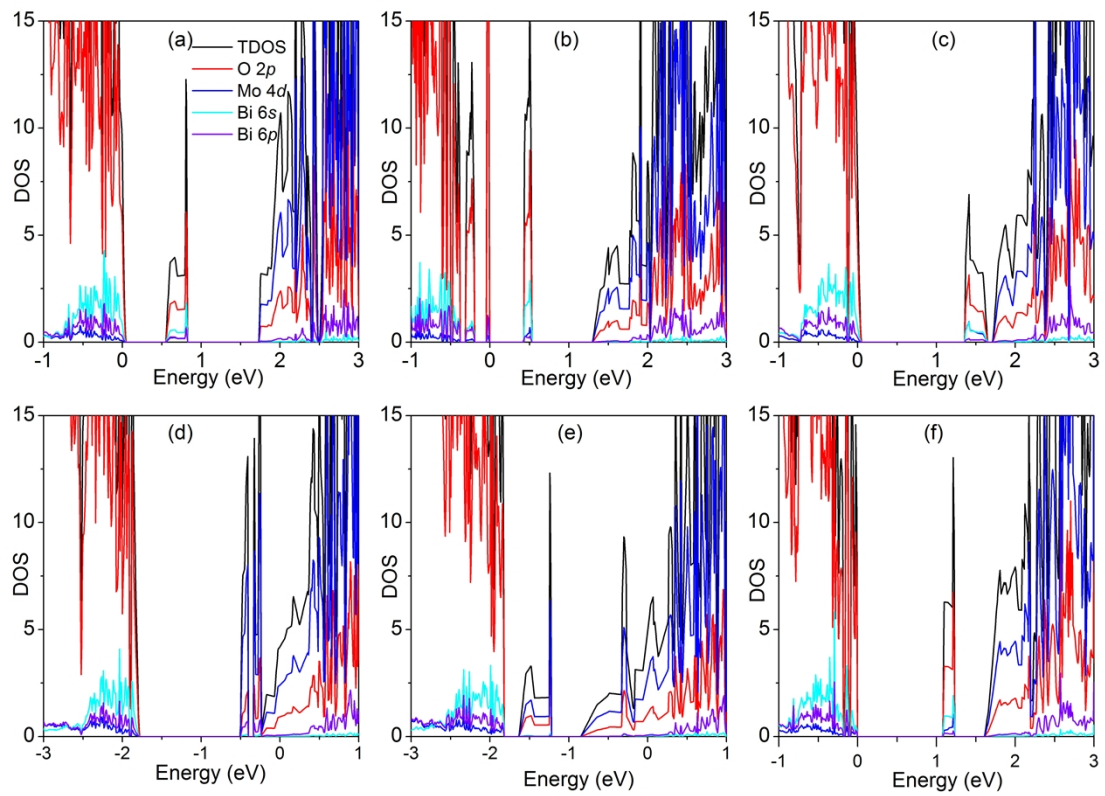

**Figure S4**
